# Supplementary material
Source: Springer Nature journal article supplement (https://www.springermedizin.de/resource/supplementary/13045_2014_393_MOESM2_ESM.pdf/9661280)
Supplement: MOESM2 [file 9661280]

Wei et al.

Additional file 2.

**Table S1. Clinical features and CD44 variant expression in the CHOP and R-CHOP groups.**

| Characteristics         | N  | CHOP |      | R-CHOP |      | P     |
|-------------------------|----|------|------|--------|------|-------|
|                         |    | n    | %    | n      | %    |       |
| Gender                  |    |      |      |        |      | 0.380 |
| Female                  | 50 | 25   | 47.2 | 25     | 39.1 |       |
| Male                    | 67 | 28   | 52.8 | 39     | 60.1 |       |
| Age(years)              |    |      |      |        |      | 0.487 |
| <60y                    | 71 | 34   | 64.2 | 37     | 57.8 |       |
| ≥60y                    | 46 | 19   | 35.8 | 27     | 42.2 |       |
| Systemic symptoms       |    |      |      |        |      | 0.360 |
| A                       | 78 | 33   | 62.3 | 45     | 70.3 |       |
| B                       | 39 | 20   | 37.3 | 19     | 29.7 |       |
| BM involvement          |    |      |      |        |      | 0.004 |
| Yes                     | 22 | 16   | 30.2 | 6      | 9.4  |       |
| No                      | 95 | 37   | 69.8 | 58     | 90.6 |       |
| LDH levels              |    |      |      |        |      | 0.015 |
| Normal                  | 71 | 26   | 47.2 | 45     | 70.3 |       |
| High                    | 46 | 27   | 52.8 | 19     | 29.7 |       |
| Ann Arbor stage         |    |      |      |        |      | 0.884 |
| I or II                 | 45 | 20   | 37.3 | 25     | 39.1 |       |
| III or IV               | 72 | 33   | 62.3 | 39     | 60.9 |       |
| No. of extranodal sites |    |      |      |        |      | 0.498 |
| 0-1                     | 81 | 35   | 66.0 | 46     | 71.9 |       |
| ≥2                      | 36 | 18   | 34.0 | 18     | 28.1 |       |
| IPI score               |    |      |      |        |      | 0.104 |
| 0-1                     | 54 | 20   | 37.7 | 34     | 53.1 |       |
| 2                       | 26 | 13   | 24.5 | 13     | 20.3 |       |
| 3                       | 18 | 7    | 13.2 | 11     | 17.2 |       |
| 4-5                     | 19 | 13   | 24.5 | 6      | 9.4  |       |
| COO subtype             |    |      |      |        |      | 0.707 |
| GCB                     | 42 | 20   | 37.7 | 22     | 34.4 |       |
| NON-GCB                 | 75 | 33   | 62.3 | 42     | 65.6 |       |
| CD44H                   |    |      |      |        |      | 0.243 |
| -                       | 42 | 16   | 30.2 | 26     | 40.6 |       |
| +                       | 75 | 37   | 69.8 | 38     | 59.4 |       |
| CD44v6                  |    |      |      |        |      | 0.261 |
| -                       | 77 | 32   | 60.4 | 45     | 70.3 |       |
| +                       | 40 | 21   | 39.6 | 19     | 29.7 |       |

Mann-Whitney U test was applied to assess the difference in distribution between the CHOP and R-CHOP groups.

**Additional file 2.**

**Table S2. Patient characteristics according to CD44H and CD44v6 expression status.**

| Characteristics         | <i>n</i>  | CD44H |    | <i>P</i> | CD44v6 |    | <i>P</i> |
|-------------------------|-----------|-------|----|----------|--------|----|----------|
|                         |           | —     | +  |          | —      | +  |          |
| Gender                  |           |       |    | 0.173    |        |    | 0.113    |
| Female                  | 53(44.2%) | 15    | 38 |          | 39     | 14 |          |
| Male                    | 67(55.8%) | 27    | 40 |          | 40     | 27 |          |
| Age(years)              |           |       |    | 0.276    |        |    | 0.309    |
| <60y                    | 72(60.0%) | 28    | 44 |          | 50     | 22 |          |
| ≥60y                    | 48(40.0%) | 14    | 34 |          | 29     | 19 |          |
| Systemic symptoms       |           |       |    | 0.887    |        |    | 0.782    |
| A                       | 81(67.5%) | 28    | 53 |          | 54     | 27 |          |
| B                       | 39(32.5%) | 14    | 25 |          | 25     | 14 |          |
| IPI score               |           |       |    | 0.130    |        |    | 0.642    |
| 0-2                     | 83(72.5%) | 33    | 50 |          | 55     | 28 |          |
| 3-5                     | 37(27.5%) | 9     | 28 |          | 24     | 13 |          |
| Bone marrow involvement |           |       |    | 0.014    |        |    | 0.365    |
| Yes                     | 23(19.2%) | 3     | 20 |          | 17     | 6  |          |
| No                      | 97(80.8%) | 39    | 58 |          | 62     | 35 |          |
| Lactate dehydrogenase   |           |       |    | 0.218    |        |    | 0.193    |
| Normal                  | 74(61.7%) | 29    | 45 |          | 52     | 22 |          |
| High                    | 46(38.3%) | 13    | 33 |          | 27     | 19 |          |
| Ann Arbor stage         |           |       |    | 0.756    |        |    | 0.309    |
| or                      | 48(40.0%) | 16    | 32 |          | 29     | 19 |          |
| or                      | 72(60.0%) | 26    | 46 |          | 50     | 22 |          |
| No. of extranodal sites |           |       |    | 0.421    |        |    | 0.273    |
| 0-1                     | 83(69.2%) | 31    | 52 |          | 52     | 31 |          |
| ≥2                      | 37(30.8%) | 11    | 26 |          | 27     | 10 |          |
| Cell-of-origin subtype  |           |       |    | 0.116    |        |    | 0.499    |
| GCB                     | 43(35.8%) | 19    | 24 |          | 30     | 13 |          |
| NON-GCB                 | 77(64.2%) | 23    | 54 |          | 49     | 28 |          |
| Treatment               |           |       |    | 0.243    |        |    | 0.261    |
| CHOP                    | 53(44.2%) | 16    | 37 |          | 32     | 21 |          |
| R-CHOP                  | 64(53.3%) | 26    | 38 |          | 45     | 19 |          |

Note: Three patients that were treated with therapies other than CHOP and R-CHOP were included in this table but excluded from the prognostic studies.

**Additional file 2.**

**Table S3. Prognostic factors and multivariable survival analysis.**

| Prognostic factors                          | Multivariable analysis |          |                  |
|---------------------------------------------|------------------------|----------|------------------|
|                                             | RR                     | 95%CI    | P                |
| <b>Analysis of the entire cohort(n=117)</b> |                        |          |                  |
| <b>Overall survival</b>                     |                        |          |                  |
| IPI (High:3~5 vs Low:0~2)                   | 2.9                    | 2.0-4.1  | <b>&lt;0.001</b> |
| CD44H (PosvsNeg)                            | 1.3                    | 0.48-3.4 | 0.618            |
| CD44v6 (PosvsNeg)                           | 2.4                    | 1.2-4.7  | <b>0.017</b>     |
| <b>Event-free survival</b>                  |                        |          |                  |
| IPI (High:3~5 vs Low:0~2)                   | 2.4                    | 1.8-3.3  | <b>&lt;0.001</b> |
| CD44H (Pos vs Neg)                          | 1.1                    | 0.47-2.5 | 0.861            |
| CD44v6 (Pos vs Neg)                         | 2.2                    | 1.1-4.1  | <b>0.019</b>     |
| <b>Analysis of the CHOP group (n=53)</b>    |                        |          |                  |
| <b>Overall survival</b>                     |                        |          |                  |
| IPI (High:3~5 vs Low:0~2)                   | 2.6                    | 1.7-4.0  | <b>&lt;0.001</b> |
| CD44H (PosvsNeg)                            | 0.93                   | 0.25-3.4 | 0.909            |
| CD44v6 (PosvsNeg)                           | 2.1                    | 0.9-5.3  | 0.098            |
| <b>Event-free survival</b>                  |                        |          |                  |
| IPI (High:3~5 vs Low:0~2)                   | 2.5                    | 1.7-3.8  | <b>&lt;0.001</b> |
| CD44H (PosvsNeg)                            | 0.76                   | 0.22-2.6 | 0.664            |
| CD44v6 (PosvsNeg)                           | 2.1                    | 0.87-5.2 | 0.096            |
| <b>Analysis of the R-CHOP group (n=64)</b>  |                        |          |                  |
| <b>Overall survival</b>                     |                        |          |                  |
| IPI (High:3~5 vs Low:0~2)                   | 2.9                    | 1.5-5.5  | <b>0.002</b>     |
| CD44H (PosvsNeg)                            | 1.6                    | 0.3-8.7  | 0.579            |
| CD44v6 (PosvsNeg)                           | 2.3                    | 0.6-8.5  | 0.226            |
| <b>Event-free survival</b>                  |                        |          |                  |
| IPI (High:3~5 vs Low:0~2)                   | 2.0                    | 1.5-4.5  | <b>0.003</b>     |
| CD44H (PosvsNeg)                            | 1.3                    | 0.38-4.4 | 0.691            |
| CD44v6 (PosvsNeg)                           | 2.0                    | 0.69-5.9 | 0.201            |
